# Supplementary material
Source: MDPI journal article supplement (https://www.mdpi.com/2079-9284/9/3/50)
Supplement: s1 [file s1]

**Table S1.** Analysis of the subject's lifestyle \*.

|                           | Placebo |         | BB-1000 |         |
|---------------------------|---------|---------|---------|---------|
|                           | Visit 1 | Visit 4 | Visit 1 | Visit 4 |
| <b>Sunscreen</b>          |         |         |         |         |
| None                      | 4       | 4       | 9       | 9       |
| 1 ~ 2                     | 17      | 14      | 6       | 5       |
| 3 ~ 4                     | 10      | 16      | 9       | 14      |
| ≥ 5                       | 14      | 11      | 21      | 14      |
| <b>Color make-up</b>      |         |         |         |         |
| None                      | 19      | 25      | 18      | 22      |
| 1 ~ 2                     | 19      | 13      | 15      | 12      |
| 3 ~ 4                     | 6       | 7       | 11      | 9       |
| ≥ 5                       | 1       | 0       | 1       | 2       |
| <b>Drinking</b>           |         |         |         |         |
| None                      | 26      | 31      | 31      | 34      |
| < 1                       | 14      | 12      | 8       | 6       |
| 1 ~ 3                     | 5       | 2       | 5       | 5       |
| ≥ 4                       | 0       | 0       | 1       | 0       |
| <b>Smoking</b>            |         |         |         |         |
| None                      | 45      | 45      | 45      | 45      |
| ≥ 1 year                  | 0       | 0       | 0       | 0       |
| < 1 year                  | 0       | 0       | 0       | 0       |
| Smoke                     | 0       | 0       | 0       | 0       |
| <b>Coffee intake</b>      |         |         |         |         |
| None                      | 5       | 4       | 4       | 1       |
| Sometimes                 | 15      | 20      | 16      | 25      |
| Everyday                  | 25      | 21      | 25      | 19      |
| <b>Outdoor activities</b> |         |         |         |         |
| < 3                       | 37      | 32      | 35      | 32      |
| < 5, ≥ 3                  | 7       | 13      | 10      | 10      |
| ≥ 5                       | 1       | 0       | 0       | 3       |
| <b>Sleep</b>              |         |         |         |         |
| < 5                       | 1       | 1       | 2       | 2       |
| < 8, ≥ 5                  | 40      | 40      | 39      | 42      |
| ≥ 8                       | 4       | 4       | 4       | 1       |

\* Sunscreen, number of people using sunscreen (times/week); Color makeup, number of people who color make-up (times/week); Drinking, number of people drinking (bottle/week); Smoking, number of people smoking; Outdoor activities (h/day); Sleep, Number of people per day sleeping (h/day).

**Table S2.** Concomitant drugs administration \*.

| Level 1                                | Level 2                                              | Placebo<br>(N = 45) | BB-1000<br>(N = 45) |
|----------------------------------------|------------------------------------------------------|---------------------|---------------------|
| <b>Alimentary tract and metabolism</b> |                                                      | 3                   | 0                   |
|                                        | Digestives, Incl., enzymes                           | 1                   | 0                   |
|                                        | Drug for acid related disorders                      | 3                   | 0                   |
|                                        | Drugs for functional gastrointestinal disorders      | 1                   | 0                   |
|                                        | Mineral supplements                                  | 1                   | 0                   |
| <b>Anti-infective for systemic use</b> |                                                      | 2                   | 0                   |
|                                        | Antibacterials for systemic use                      | 0                   | 0                   |
| <b>Dermatologicals</b>                 |                                                      | 1                   | 0                   |
|                                        | Antifungals for dermatological use                   | 1                   | 0                   |
|                                        | Corticosteroids, Dermatological preparations         | 1                   | 0                   |
| <b>Musculo-Skeletal system</b>         |                                                      | 4                   | 0                   |
|                                        | Antiinflammatory and Antirheumatic products          | 4                   | 0                   |
|                                        | Other drugs for disorders of Musculo-skeletal system | 3                   | 0                   |
| <b>Nervous system</b>                  |                                                      | 1                   | 0                   |
|                                        | Analgesics                                           | 1                   | 0                   |
|                                        | Antiepileptics                                       | 1                   | 0                   |
| <b>Respiratory system</b>              |                                                      | 2                   | 0                   |
|                                        | Antihistamines for systemic use                      | 2                   | 0                   |
|                                        | Cough and cold preparation                           | 1                   | 0                   |
| <b>Total</b>                           |                                                      | 4                   | 0                   |

\* Number of people drugs (or dietary supplements) taken with placebo or BB-1000 during clinical trials. Drugs are classified according to the ATC code.
